# Supplementary material
Source: Springer Nature journal article supplement (https://www.springermedizin.de/resource/supplementary/12943_2010_811_MOESM8_ESM.pdf/9554886)

**A.**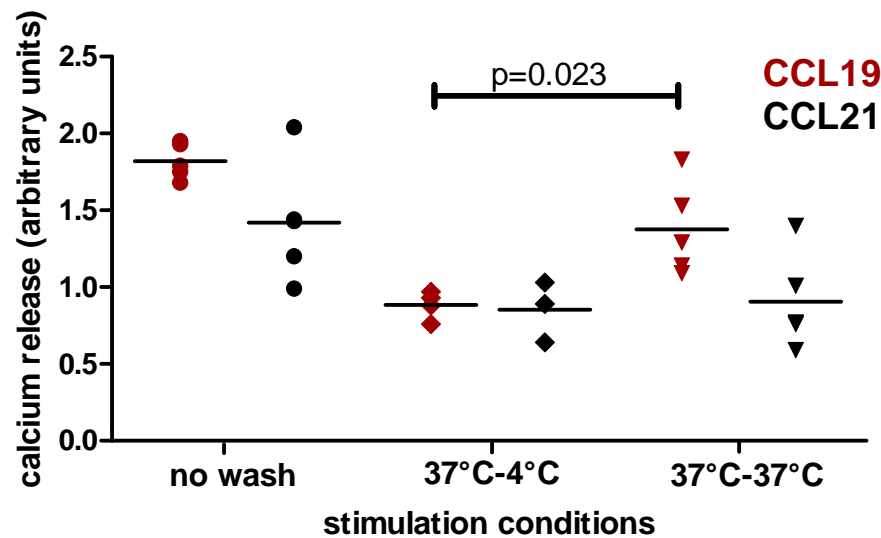**B.**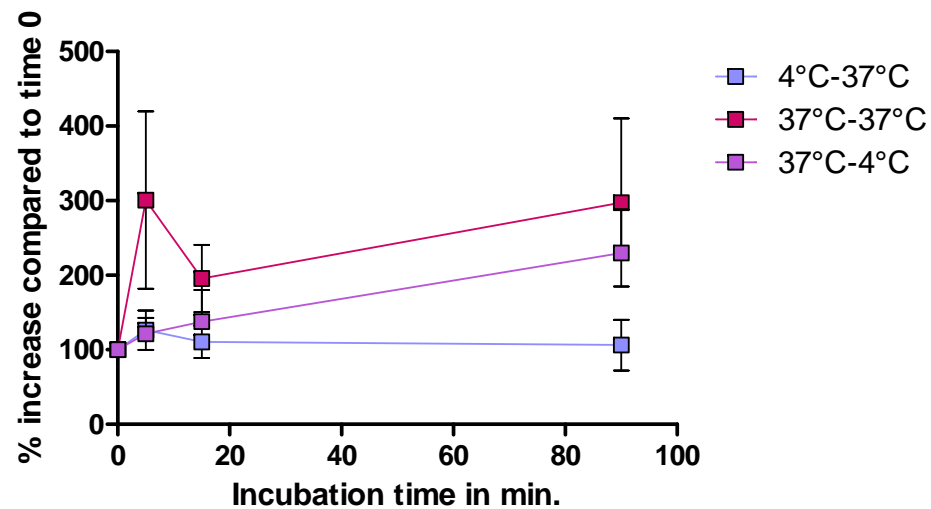**C.**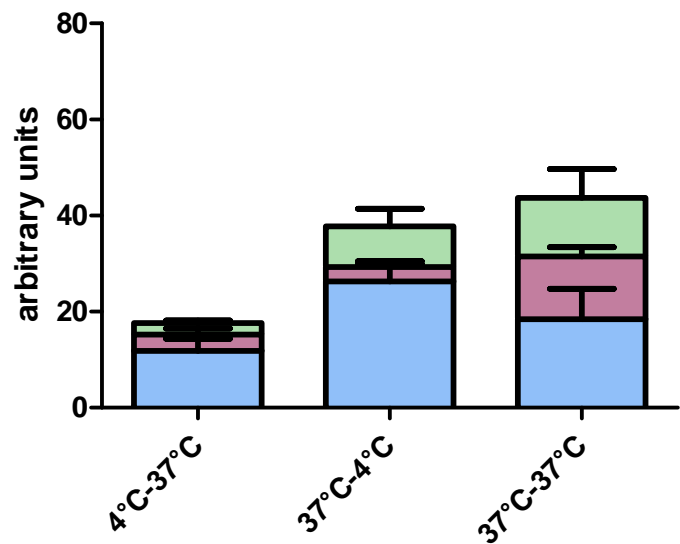**D.**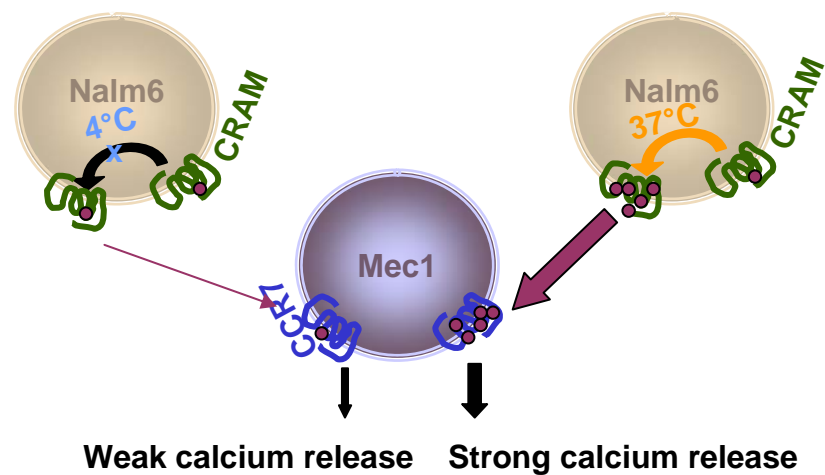

Supplement: MOESM8 [file 9554886]
